# Supplementary material
Source: PubMed Central journal article supplement (PMC9731633)
Supplement: ASN.2022030286-s0001.pdf [file ASN.2022030286-s0001.pdf]

## **Supplemental Material Table of Contents**

**Supplementary Table 1.** List of monoclonal antibodies used.

**Supplementary Table 2.** List of main reagents used.

**Supplementary Table 3.** Gene signature of TEMRA CD8 based on a review of literature.

**Supplementary Table 4.** Differential genes expressed in TEMRA CD8 vs EM CD8 in KT patients.

**Supplementary Figure 1.** Overall study design.

**Supplementary Figure 2.** Expansion of TEMRA CD8 in KT with biopsy-proven ABMR.

**Supplementary Figure 3.** Migratory properties of memory CD8 T cells (TEMRA and EM): adhesion to activated HDMECs and chemokine screening by transmigration assays.

**Supplementary Figure 4.** Accumulation of TEMRA CD8 T cells in the kidney graft of KT with ABMR.

**Supplementary Figure 5.** CXCL12 acts as a costimulatory signal for memory (TEMRA and EM) CD8 T cells.

**Supplementary Figure 6.** Short-term IL-15 stimulation enhances the selectivity of memory (TEMRA and EM) CD8 T cells to P-selectin.

**Supplementary Figure 7.** Inhibition of glycolysis impairs the generation of functional PSGL-1.

### **Supplementary Figure 1. Overall study design.**

### **Supplementary Figure 2. Expansion of TEMRA CD8 in KT with biopsy-proven ABMR.**

KT were recruited 1 year after their transplantation and with either biopsy-proven ABMR (n=12) or normal histological biopsy (n=52; recipient age and gender matched) (A) Absolute number per mL of blood of subsets of CD8 T cells. (B) Spearman correlation between the frequency of TEMRA CD8 among CD8 T cells and the percentage of CD107a<sup>+</sup> among CD8 T cells. Data represents the median±IQR[25%-75%] and the value (point) of a single patient and one representative patient. The p-values were calculated using the Mann-Whitney test \*\* p<0.01.

### **Supplementary Figure 3. Migratory properties of memory CD8 T cell (TEMRA and EM): adhesion to activated HDMECs and chemokine screening by transmigration assays.** (A)

Transcriptomic profiling of chemokine receptor expression by EM and TEMRA CD8 T cells according to published RNA-seq data<sup>10</sup>. (B) Targeted proteomic analysis of chemokine receptor expression by EM and TEMRA CD8 T cells based on the ImmunoProt database<sup>24</sup>. (C) Transmigration of CD8 T cell subsets across TNF $\alpha$  (100 U/ml, O/N)-treated HDMEC monolayers in response to the indicated chemokines and cytokines. (D) Impact of CXCL12 (50 ng/ml) on the roundness of CD8 T cell subsets from KT and HVs. The roundness was tracked for all cells during the entire observational period using Fiji- and MATLAB-based scripts. A roundness of 1 is obtained for a perfect circular shape and 0 for a flat shape. (E) Migration of Fura-2-labeled CD8 T cell subsets from KT and HV onto TNF $\alpha$ -treated HDMEC monolayers. Average velocity of CD8 T cell subsets is shown. The p-values were calculated using Wilcoxon matched-pairs signed rank test (A), nonparametric ANOVA (Kruskal-Wallis) with Dunn's multiple comparisons test (C) and the Wilcoxon matched-pairs signed rank test. \* p<0.05, \*\* p<0.01.

**Supplementary Figure 4. Accumulation of TEMRA CD8 T cells in the kidney graft of KT with ABMR.** (A) GSEA analysis of TEMRA gene signature derived from the literature (**Supplementary Table 3**) in gene expression data of kidney biopsies from kidney transplanted patients with or without ABMR (n= 56 and 168, respectively)<sup>1</sup> (GSE147089). The normalized enrichment score (NES) is the degree to which a gene set is overrepresented, normalized across analyzed gene sets. The nominal P-value (NOM P-val) is the statistical significance of the enrichment score. (B) Correlation between expression of *CD8* and TEMRA-associated genes in patients with ABMR (pink) and normal biopsy (shaded gray). Correlation was calculated using nonparametric Spearman correlation.

**Supplementary Figure 5. Combined stimulation with CXCL12 and TCR results in the selective activation of memory CD8 T cells (TEMRA and EM).** Frequency of CD69<sup>+</sup>CD107a<sup>+</sup> among the EM (green dot), TEMRA (red dot) and NAÏVE (black dot) CD8 T cells from KT (A, B) or HVs (B) after 4 h of stimulation with plate-bound anti-CD3 mAb (2 µg/ml) or aCD3 + CXCL12 (50 ng/ml). Data represent the median (gray histogram) and the value (point) of a single HV. The p-values were calculated using nonparametric ANOVA (Kruskal-Wallis) with Dunn's multiple comparisons test. \* p<0.05, \*\* p<0.01, \*\*\*\* p<0.0001

**Supplementary Figure 6. Short-term IL-15 stimulation enhances the selectivity of memory (TEMRA and EM) CD8 T cells to P-selectin.** (A) CD8 T cell subsets (NAÏVE, black; EM, green; TEMRA, red) were purified from HVs and stimulated, when indicated, O/N with IL-15 (10 ng/ml). Binding of CD8 T cell subsets to P-selectin chimeric proteins was quantified. Data represent the median (gray histogram), the value (point) of a single HV and one representative histogram. The p-values were calculated using nonparametric ANOVA (Kruskal-Wallis) with Dunn's multiple comparisons test. \* p<0.05, \*\*\*\* p<0.0001. (B) Gating strategy to analyze the incorporation of ManAc by purified CD8 T cells incubated O/N with Click-IT ManNAz (ManAc) and, when indicated, IL-15 (10 ng/ml). CD8 T cells were then

treated with 2-DG (50  $\mu$ M, 4 h, 37°C) before the quantification of the incorporation of ManAc after cell permeabilization (intra) or cell fixation (extra). Incorporation of ManAc was quantified after cell permeabilization (Intracellular) or cell fixation (Extracellular).

**Supplementary Figure 7. Inhibition of glycolysis impairs the generation of functional PSGL-1.** CD8 T cell were purified from HVs and stimulated O/N with IL-15 (10 ng/ml) and , when indicated, in the presence of 2-DG (50  $\mu$ M). Expression by EM and TEMRA of total and functional PSGL-1 was quantified by flow cytometry using KPL-1 and CHO131 anti-PSGL-1 mAb respectively. Data represent the value (point) of a single HV and one representative histogram. The p-values were calculated using nonparametric paired Wilcoxon test. \*  $p < 0.05$ .

---

| Target | Fluorochrome | Clone Name | Provider       |
|--------|--------------|------------|----------------|
| CD3    | BV421        | UCHT1      | BD Biosciences |
| CD3    | VioBlue      | HIT3a      | BD Biosciences |
| CD3    |              | OKT3       | Invitrogen     |
| CD3    | FITC         | UCHT1      | BD Biosciences |
| CD8    | VioGreen     | BW135/80   | Miltenyi       |
| CD8    | PE-Cy7       | RPA-T8     | BD Biosciences |
| CD8    | Purified     | C8/144B    | Dako           |
| CD28   | PE-CF594     | CD28.2     | BD Biosciences |
| CD28   | Purified     | CD28.2     | Invitrogen     |
| CD45RA | APC-Vio770   | TD611      | Miltenyi       |
| CD162  | PE           | KPL1       | BD Biosciences |
| CD11a  | APC          | HI111      | BD Biosciences |
| CD49d  | FITC         | 9F10       | BD Biosciences |
| CD162  | Purified     | CHO131     | R&D Systems    |
| PERF1  | PE           | B-D48      | Diaclone       |
| GZMB   | PE-C7        | QA18A28    | Biolegend      |

|           |        |         |                |
|-----------|--------|---------|----------------|
| Caspase-3 | PE     | C92 605 | BD Biosciences |
| IgM       | PE     | C48-6   | BD Biosciences |
| VLA-4     | PE-Cy7 | 9F10    | Biolegend      |
| LFA-1     | PE     | G4325B  | Biolegend      |

---

**Supplementary Table 1. Listing of monoclonal antibodies**

| Reagent or Resource                                                                                    | Provider      |
|--------------------------------------------------------------------------------------------------------|---------------|
| Oligomycin                                                                                             | Sigma         |
| 6-Diazo-5-oxo-L-norleucine (DON)                                                                       | Sigma         |
| 2-Deoxy-D-glucose (2-DG)                                                                               | Sigma         |
| Neuraminidase                                                                                          | Sigma         |
| CXCL10                                                                                                 | PeptoTech     |
| CXCL9                                                                                                  | PeptoTech     |
| IL-8                                                                                                   | PeptoTech     |
| CXCL12 (SDF1 $\alpha$ )                                                                                | R&D Systems   |
| <sup>10</sup> Panx                                                                                     | R&D Systems   |
| Recombinant human P-selectin                                                                           | R&D Systems   |
| P2X1 (NF023)                                                                                           | R&D Systems   |
| P2X4 (5-BDBD)                                                                                          | R&D Systems   |
| P2X7 (A438079)                                                                                         | R&D Systems   |
| TNF $\alpha$                                                                                           | R&D Systems   |
| IL-15                                                                                                  | Miltenyi      |
| CD8 T cell Isolation Kit human                                                                         | Miltenyi      |
| Human REAlease CD8 MicroBead Kit                                                                       | Miltenyi      |
| TexMacs medium                                                                                         | Miltenyi      |
| Endothelial Cell Growth Medium                                                                         | Lonza         |
| CCCP                                                                                                   | Sigma         |
| 123count eBeads™ Counting Beads                                                                        | Thermo Fisher |
| Fura2                                                                                                  | Thermo Fisher |
| ApoSENSOR™ ATP Cell Viability Bioluminescence Assay Kit                                                | BioVision     |
| PE-anti-human IgG Fc                                                                                   | Thermo Fisher |
| Click-iT® Cell Reaction Buffer Kit and alkyne Alexa Fluor® 488                                         | Invitrogen    |
| Click-IT™ ManNAz Metabolic Glycoprotein Labeling Reagent (tetraacetylated N-Azidoacetyl-D-Mannosamine) | Invitrogen    |

|                                                 |               |
|-------------------------------------------------|---------------|
| BD Cytotfix/Cytoperm™ kit                       | BD Bioscience |
| μ-Slide 8 well                                  | ibidi         |
| Poly-L-Lysine precoated μ-Slide 8 well          | ibidi         |
| RPMI 1640 medium                                | Thermo Fisher |
| FBS                                             | Sigma         |
| Glutamax                                        | Thermo Fisher |
| Penicillin-Streptomycin-Neomycin Solution       | Sigma         |
| IL-2                                            | Biologend     |
| Trypan blue                                     | Gibco         |
| Ficoll-Paque Plus                               | GE Healthcare |
| Cell Proliferation Dye eFluor V450              | Thermo Fisher |
| Fixable Viability Dye 440UV                     | BD Bioscience |
| Fc Block                                        | BD Bioscience |
| OPAL 520                                        | Akoya         |
| DAPI                                            | Invitrogen    |
| TR1, TR2                                        | Impath        |
| Poly-E and HRP-2-Step                           | Impath        |
| Vectashield® Vibrance™ Antifade Mounting Medium | Vector        |

---

**Supplementary Table 2. List of reagents**



| <b>Gene Name</b> | <b>References</b> |
|------------------|-------------------|
| <b>CD3D</b>      | 2                 |
| <b>CD3E</b>      | 2                 |
| <b>CD3G</b>      | 2                 |
| <b>CD8A</b>      | 2                 |
| <b>CD8B</b>      | 2                 |
| <b>TBX21</b>     | 2-4               |
| <b>IFNG</b>      | 2                 |
| <b>CX3CR1</b>    | 2-6               |
| <b>GZMB</b>      | 2                 |
| <b>GZMH</b>      | 2                 |
| <b>GNLY</b>      | 2                 |
| <b>PRF1</b>      | 2                 |
| <b>FCGR3A</b>    | 2-7               |
| <b>PRDM1</b>     | 2                 |
| <b>HK2</b>       | 8                 |
| <b>Zeb2</b>      | 9                 |
| <b>Ezh2</b>      | 8                 |
| <b>Bcl6</b>      | 8                 |
| <b>EOMES</b>     | 8                 |
| <b>ID3</b>       | 8                 |
| <b>TNFa</b>      | 2-6               |
| <b>KLRD1</b>     | 10                |
| <b>IL7R</b>      | 10-12             |
| <b>CD28</b>      | 10-12             |

**Supplementary Table 3. Gene signature of TEMRA CD8 based on a review of literature.**

## Upregulated genes in TEMRA CD8 vs EM CD8

| Gene Symbol | log <sub>2</sub> FC | AveExpr | P.Value  | adj.P.Val |
|-------------|---------------------|---------|----------|-----------|
| SH2D1B      | 5,67                | 1,553   | 4,44E-07 | 0,0022    |
| RAMP1       | 5,17                | 1,702   | 9,54E-06 | 0,0072    |
| LAT2        | 4,18                | 2,250   | 1,05E-05 | 0,0072    |
| KLRF1       | 4,01                | 3,263   | 3,83E-06 | 0,0057    |
| FCGR3A      | 4,01                | 2,942   | 1,44E-06 | 0,0034    |
| FGFBP2      | 3,87                | 5,475   | 4,95E-06 | 0,0059    |
| NCR1        | 3,83                | 3,236   | 1,43E-06 | 0,0034    |
| ZEB2-AS1    | 3,75                | 1,650   | 3,01E-04 | 0,0440    |
| GNLY        | 3,61                | 10,829  | 1,35E-04 | 0,0282    |
| SPON2       | 3,45                | 2,101   | 3,56E-04 | 0,0451    |
| KIR3DL2     | 3,40                | 1,305   | 1,49E-04 | 0,0300    |
| LAIR2       | 3,40                | 0,589   | 3,46E-04 | 0,0451    |
| KIR3DL1     | 3,36                | 0,614   | 1,65E-04 | 0,0313    |
| SYNGR1      | 3,33                | 1,641   | 1,57E-05 | 0,0082    |
| TYROBP      | 3,17                | 6,038   | 2,13E-04 | 0,0361    |
| CX3CR1      | 3,09                | 1,235   | 4,57E-07 | 0,0022    |
| PRSS23      | 3,06                | 1,597   | 9,19E-06 | 0,0072    |
| HAVCR2      | 3,00                | 2,797   | 5,03E-05 | 0,0154    |
| CD38        | 2,93                | 1,507   | 2,61E-04 | 0,0409    |
| GSN         | 2,89                | 1,716   | 3,38E-04 | 0,0451    |
| GPR56       | 2,78                | 2,958   | 2,00E-05 | 0,0087    |
| AKR1C3      | 2,54                | 0,962   | 3,83E-05 | 0,0139    |
| FHL3        | 2,34                | 1,366   | 4,67E-05 | 0,0153    |
| CXXC5       | 2,29                | 1,691   | 2,02E-04 | 0,0352    |
| TTC38       | 2,09                | 3,052   | 2,04E-04 | 0,0352    |
| SPINK2      | 2,09                | 0,224   | 1,06E-04 | 0,0245    |
| CCL4        | 2,01                | 5,263   | 4,57E-05 | 0,0153    |
| FGR         | 1,99                | 3,102   | 3,49E-04 | 0,0451    |
| CD160       | 1,97                | 1,944   | 1,79E-04 | 0,0327    |
| MTSS1       | 1,97                | 2,094   | 8,67E-05 | 0,0227    |
| LAYN        | 1,77                | 0,492   | 6,97E-05 | 0,0200    |
| PION        | 1,76                | 1,625   | 3,63E-04 | 0,0452    |
| UBE2F       | 1,72                | 4,388   | 1,25E-05 | 0,0074    |
| PTPN12      | 1,71                | 1,708   | 3,08E-04 | 0,0443    |
| NMUR1       | 1,54                | 0,554   | 9,36E-05 | 0,0228    |
| IFIT2       | 1,52                | 2,793   | 2,14E-05 | 0,0087    |
| CERS4       | 1,51                | 1,909   | 9,94E-05 | 0,0236    |
| PDLIM1      | 1,50                | 2,536   | 4,10E-04 | 0,0498    |
| IFIT3       | 1,45                | 3,120   | 8,50E-05 | 0,0227    |
| GNPTAB      | 1,41                | 2,380   | 8,85E-05 | 0,0227    |
| LIMK1       | 1,40                | 1,365   | 2,68E-04 | 0,0409    |
| FAM46A      | 1,39                | 1,317   | 8,23E-05 | 0,0227    |
| TTC28-AS1   | 1,32                | 1,955   | 4,86E-05 | 0,0154    |
| GEMIN7      | 1,26                | 2,982   | 1,37E-04 | 0,0282    |
| C5orf56     | 1,05                | 5,291   | 2,67E-04 | 0,0409    |

| Gene      | Downregulated genes in TEMRA CD8 vs EM CD8 |        |          |                  |
|-----------|--------------------------------------------|--------|----------|------------------|
|           | Log2FC                                     | Count  | P-value  | Adjusted P-value |
| DYNLT3    | -1,00                                      | 4,237  | 3,39E-04 | 0,0451           |
| S100A11   | -1,00                                      | 6,683  | 3,57E-04 | 0,0451           |
| KDSR      | -1,14                                      | 2,795  | 3,14E-04 | 0,0444           |
| CDC14A    | -1,16                                      | 3,307  | 3,43E-04 | 0,0451           |
| PLK3      | -1,27                                      | 2,493  | 1,33E-04 | 0,0282           |
| TMEM154   | -1,33                                      | 2,298  | 4,28E-05 | 0,0150           |
| INPP4B    | -1,35                                      | 2,633  | 2,95E-04 | 0,0437           |
| ANO9      | -1,38                                      | 1,580  | 2,38E-04 | 0,0389           |
| TNIP3     | -1,48                                      | 1,893  | 2,50E-04 | 0,0402           |
| TC2N      | -1,54                                      | 4,425  | 2,81E-04 | 0,0422           |
| CENPM     | -1,73                                      | 2,021  | 1,11E-04 | 0,0245           |
| ANTXR2    | -1,91                                      | 1,828  | 2,53E-05 | 0,0096           |
| SPON1     | -1,93                                      | 0,678  | 3,87E-04 | 0,0477           |
| HNRPLL    | -1,98                                      | 1,937  | 5,88E-06 | 0,0062           |
| FLT4      | -2,06                                      | 0,072  | 1,88E-04 | 0,0336           |
| NCF4      | -2,16                                      | 1,192  | 1,61E-04 | 0,0310           |
| AQP3      | -2,16                                      | 3,847  | 1,09E-04 | 0,0245           |
| CCR5      | -2,22                                      | 1,929  | 1,54E-04 | 0,0304           |
| HNMT      | -2,23                                      | -0,178 | 1,73E-04 | 0,0322           |
| ELOVL4    | -2,24                                      | 0,219  | 2,10E-05 | 0,0087           |
| AMICA1    | -2,25                                      | 4,414  | 9,40E-06 | 0,0072           |
| CCR2      | -2,35                                      | -0,443 | 2,31E-04 | 0,0385           |
| WDR86-AS1 | -2,39                                      | 0,991  | 6,66E-05 | 0,0197           |
| GPR183    | -2,40                                      | 5,542  | 1,51E-05 | 0,0082           |
| IL7R      | -2,51                                      | 7,638  | 1,90E-05 | 0,0087           |
| FAAH2     | -2,52                                      | 1,387  | 3,38E-04 | 0,0451           |
| CD28      | -2,55                                      | 2,409  | 1,66E-05 | 0,0083           |
| GPR15     | -2,79                                      | 0,750  | 2,21E-05 | 0,0087           |
| SLAMF1    | -2,80                                      | 1,995  | 4,19E-06 | 0,0057           |
| GZMK      | -2,84                                      | 7,141  | 1,14E-05 | 0,0072           |
| DPP4      | -3,75                                      | 2,265  | 1,13E-05 | 0,0072           |
| CCR4      | -3,78                                      | 0,115  | 9,12E-05 | 0,0228           |
| CCR6      | -3,89                                      | 1,028  | 2,87E-06 | 0,0054           |

**Supplementary Table 4. Differential expressed genes in TEMRA CD8 vs EM CD8 in KT patients.**

## References

1. Callemeyn J, Lerut E, Loo H de, Arijs I, Thauinat O, Koenig A, et al.: Transcriptional Changes in Kidney Allografts with Histology of Antibody-Mediated Rejection without Anti-HLA Donor-Specific Antibodies. *J Am Soc Nephrol* 31: 2168–2183, 2020
2. Conde CD, Xu C, Jarvis L, Rainbow D, Wells S, Gomes T, et al.: Cross-tissue immune cell analysis reveals tissue-specific features in humans\*\*. *Sci New York N Y* 376: eab15197–eab15197, 2022
3. Yap M, Boeffard F, Clave E, Pallier A, Danger R, Giral M, et al.: Expansion of Highly Differentiated Cytotoxic Terminally Differentiated Effector Memory CD8<sup>+</sup> T Cells in a Subset of Clinically Stable Kidney Transplant Recipients: A Potential Marker for Late Graft Dysfunction. *J Am Soc Nephrol* 25: 1856–1868, 2014
4. Jacquemont L, Tilly G, Yap M, Doan-Ngoc T-M, Danger R, Guérif P, et al.: Terminally Differentiated Effector Memory CD8<sup>+</sup> T Cells Identify Kidney Transplant Recipients at High Risk of Graft Failure. *J Am Soc Nephrol* 31: 876–891, 2020
5. Böttcher JP, Beyer M, Meissner F, Abdullah Z, Sander J, Höchst B, et al.: Functional classification of memory CD8<sup>+</sup> T cells by CX3CR1 expression. *Nat Commun* 6: 8306, 2015
6. Rieckmann JC, Geiger R, Hornburg D, Wolf T, Kveler K, Jarrossay D, et al.: Social network architecture of human immune cells unveiled by quantitative proteomics. *Nat Immunol* 18: 583–593, 2017
7. Georg P, Astaburuaga-García R, Bonaguro L, Brumhard S, Michalick L, Lippert LJ, et al.: Complement activation induces excessive T cell cytotoxicity in severe COVID-19. *Cell* 185: 493-512.e25, 2022
8. Neitzke-Montinelli V, Calôba C, Melo G, Frade BB, Carames E, Mazzocchi L, et al.: Differentiation of Memory CD8 T Cells Unravel Gene Expression Pattern Common to Effector and Memory Precursors. *Front Immunol* 13: 840203, 2022
9. Omilusik KD, Best JA, Yu B, Goossens S, Weidemann A, Nguyen JV, et al.: Transcriptional repressor ZEB2 promotes terminal differentiation of CD8<sup>+</sup> effector and memory T cell populations during infection. *J Exp Med* 212: 2027–2039, 2015
10. Willinger T, Freeman T, Hasegawa H, McMichael AJ, Callan MFC: Molecular Signatures Distinguish Human Central Memory from Effector Memory CD8 T Cell Subsets. *J Immunol* 175: 5895–5903, 2005
11. Appay V, Dunbar PR, Callan M, Klenerman P, Gillespie GMA, Papagno L, et al.: Memory CD8<sup>+</sup> T cells vary in differentiation phenotype in different persistent virus infections. *Nat Med* 8: 379–385, 2002

12. Yap M, Tilly G, Giral M, Brouard S, Degauque N: Benefits of Using CD45RA and CD28 to Investigate CD8 Subsets in Kidney Transplant Recipients. *Am J Transplant* 16: 999–1006, 2016

Kidney recipient

Healthy volunteer    Humoral rejection    Normal histology

|                                                                                     |                                                                                     |               |                                                                                                                     |
|-------------------------------------------------------------------------------------|-------------------------------------------------------------------------------------|---------------|---------------------------------------------------------------------------------------------------------------------|
|   |   | <b>Blood</b>  | Adhesion to endothelium<br>Transmigration across endothelium<br>P-Selectin binding assay                            |
|                                                                                     |  | <b>Blood</b>  | RNAseq of<br>TEMRA/EM CD8                                                                                           |
|  |  | <b>Blood</b>  | Single-cell functional profiling of CD8<br>% of CD8 subsets<br>Absolute number of CD8 subsets<br>Cytotoxic function |
|  |  | <b>Kidney</b> | CD8 T cell infiltration<br>TEMRA CD8-related genes                                                                  |

Supplementary Figure 1

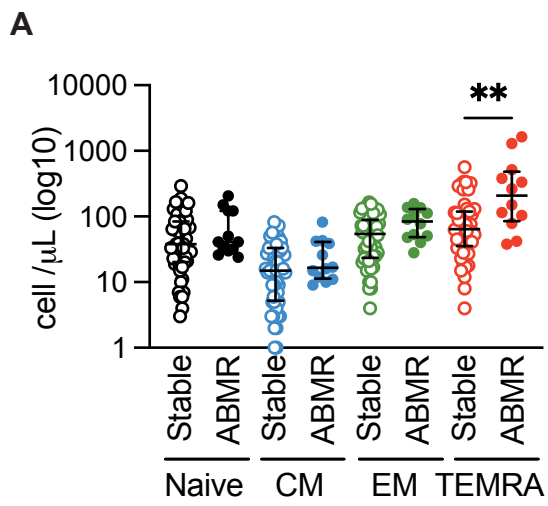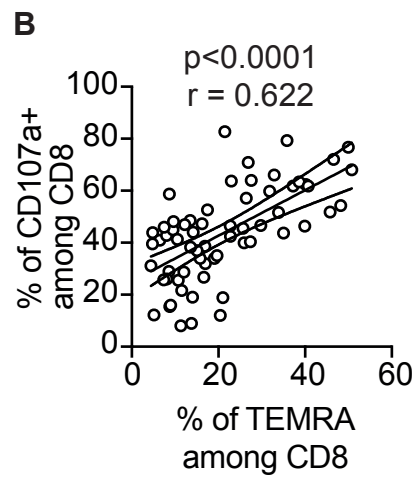

Supplementary Figure 2

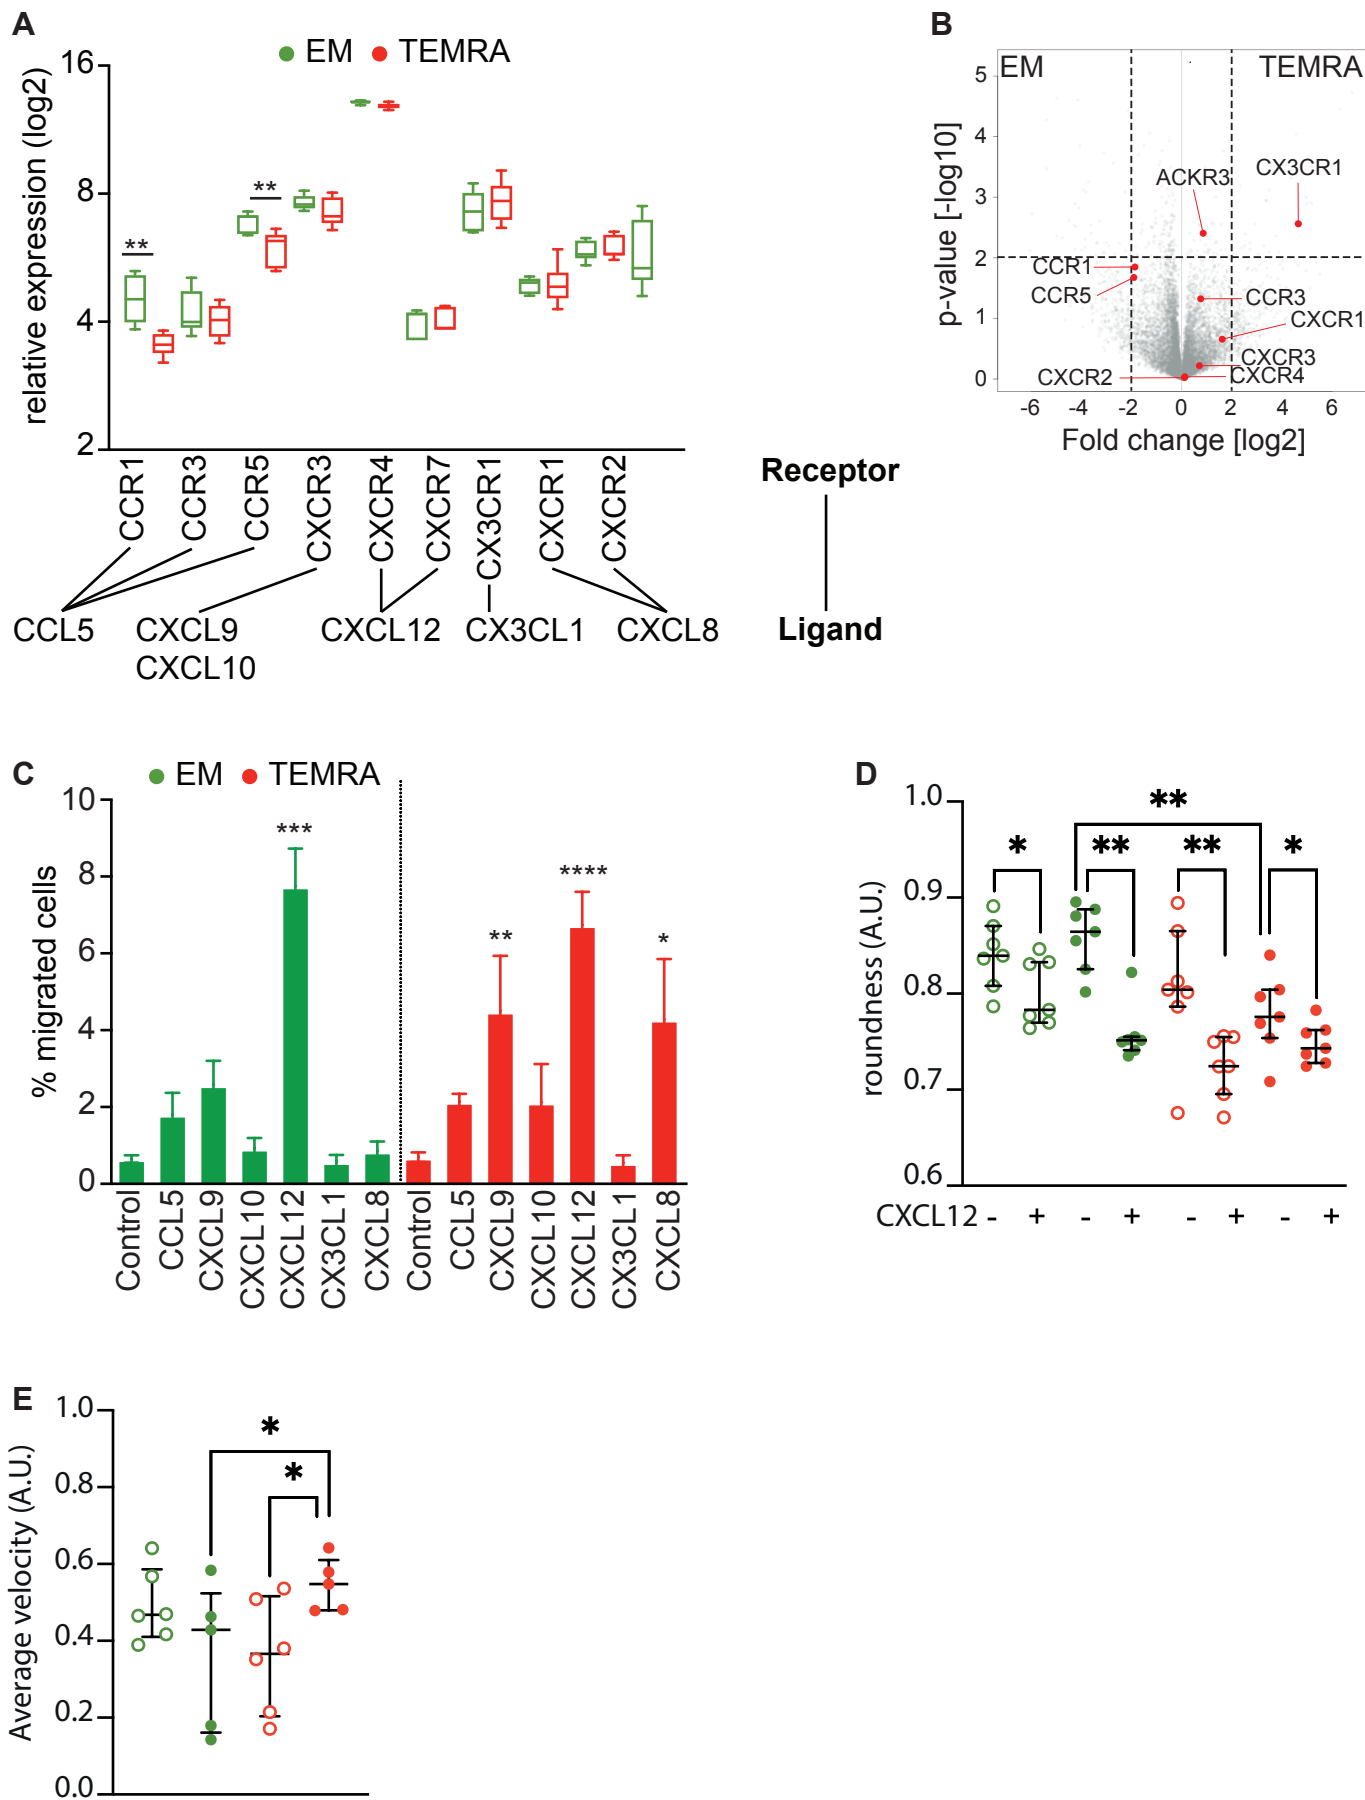

Supplementary Figure 3



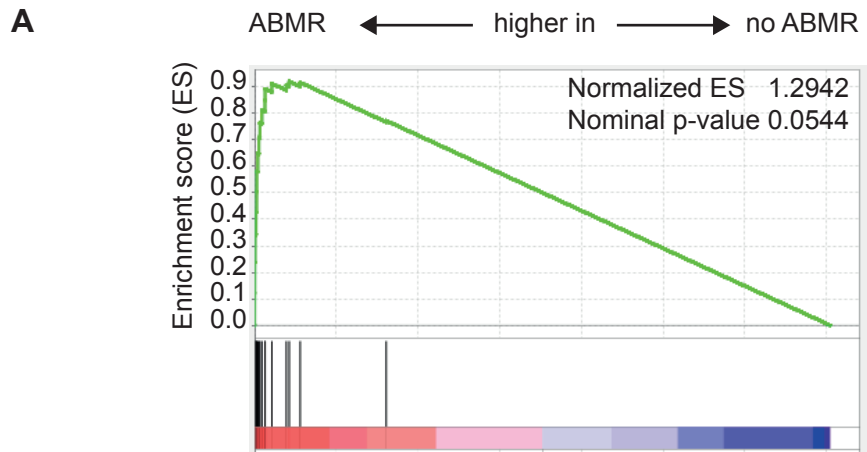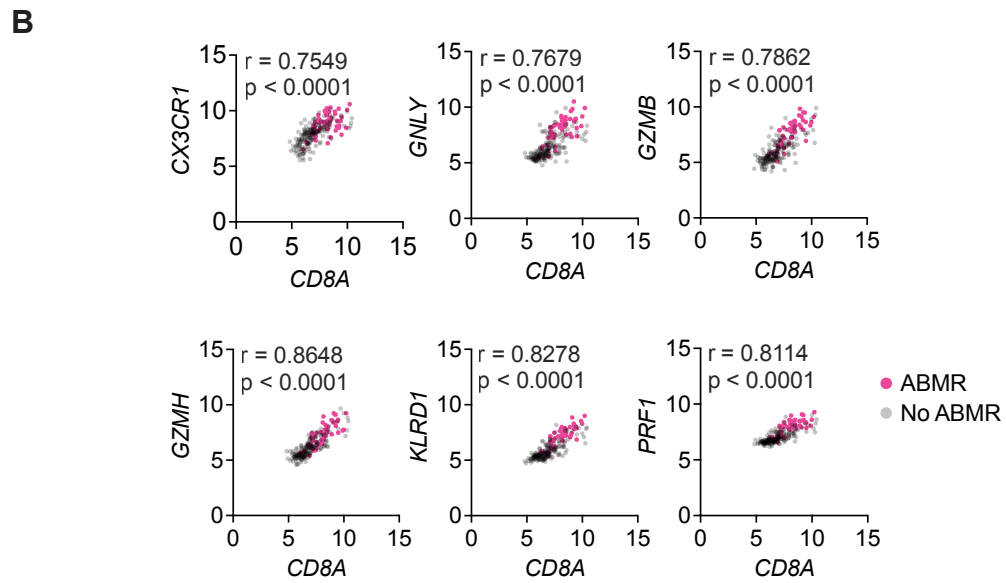

**Supplementary Figure 4**

**A**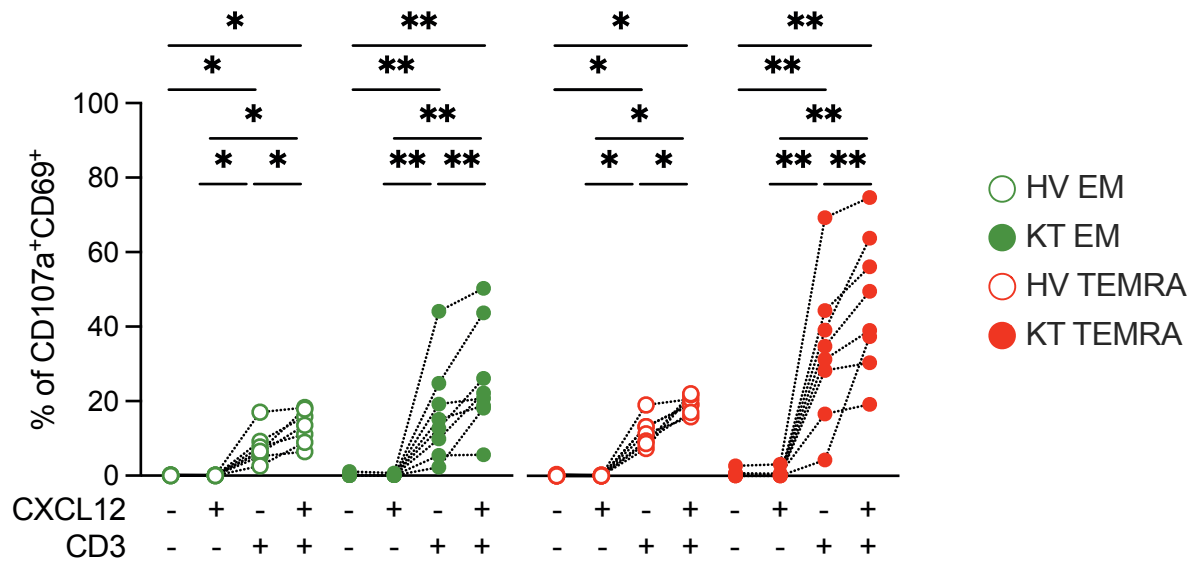**B**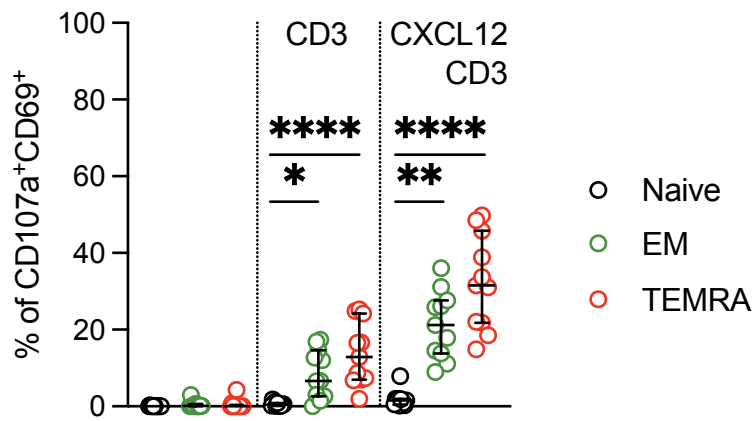

Supplementary Figure 5

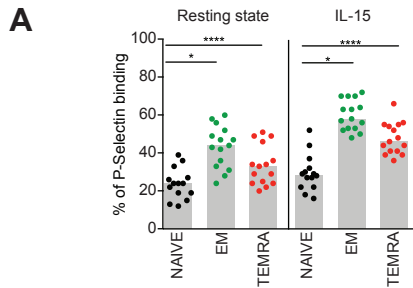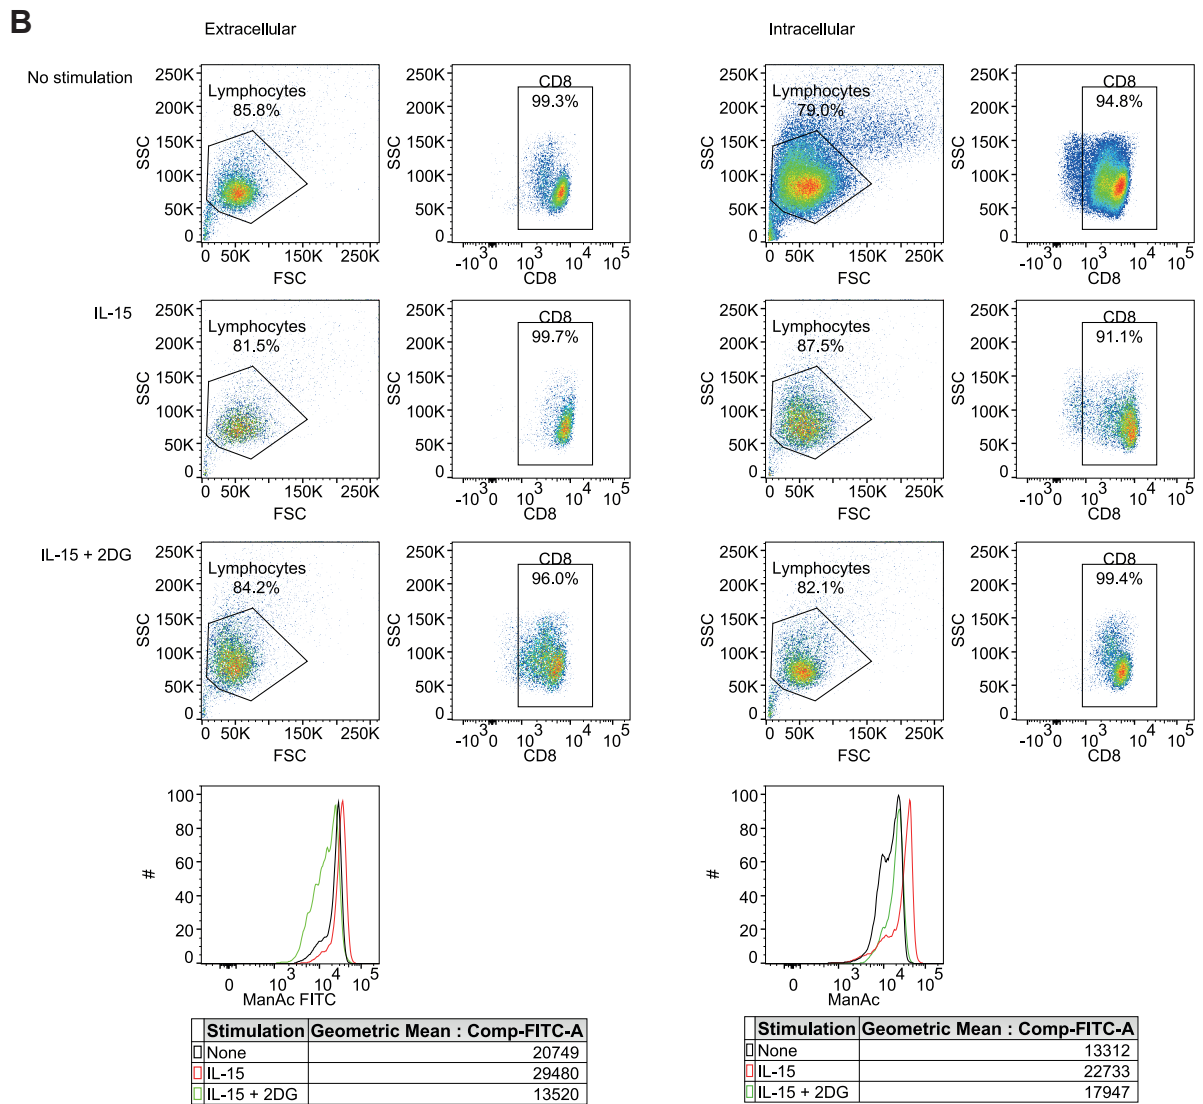

Supplementary Figure 6

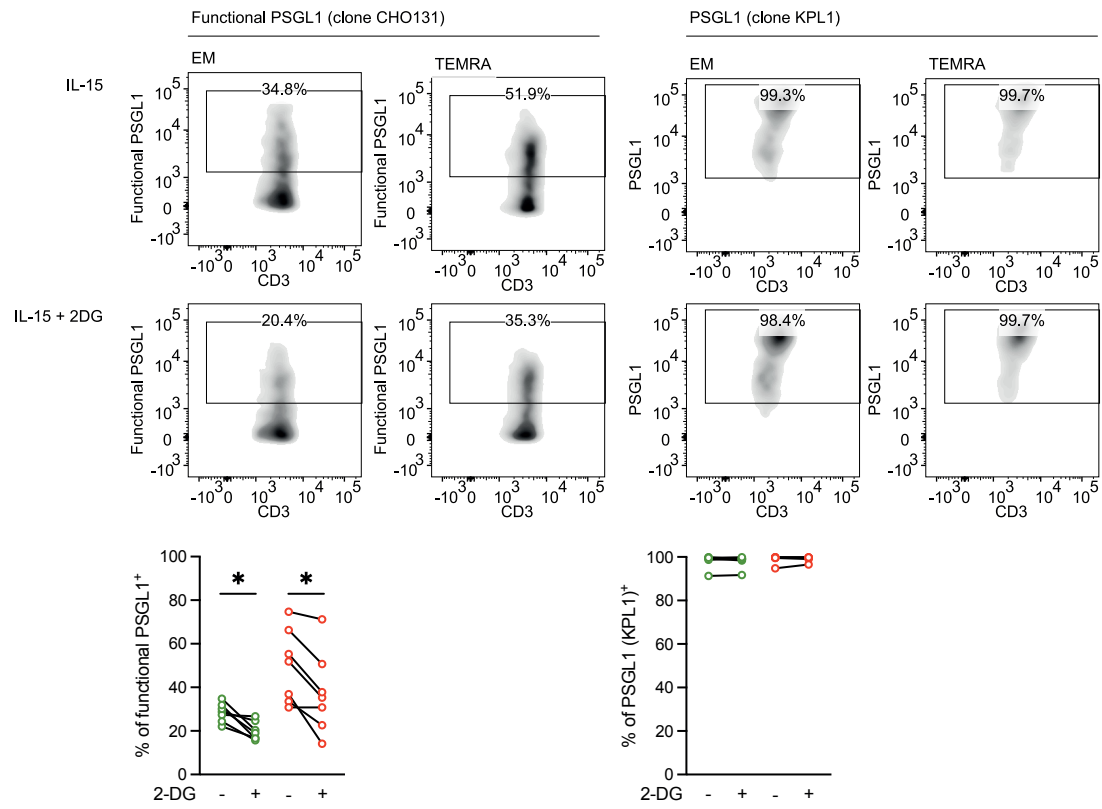

**Supplementary Figure 7**
